# Supplementary material
Source: ML conference proceedings conference paper supplement (https://proceedings.mlr.press/v38/anderson15.html)
Supplement: Supplementary file [file anderson15-supp.pdf]

# Spectral Gap Error Bounds for Improving CUR Matrix Decomposition and the Nyström Method: Supplementary Material

## 1 Preliminaries

First we prove a useful theorem, which is similar to [3] theorem 3.5.

**Theorem S.1.** *Let  $Q_c$  be an  $m \times c$  column-orthonormal matrix. Let  $Q_r$  be a  $n \times r$  column-orthonormal matrix. Let  $B_k$  be the rank- $k$  truncated SVD of  $Q_c^T A Q_r$ . We have:*

$$\min_{\text{rank}(B) \leq k, B \in \mathbb{R}^{c \times r}} \|A - Q_c B Q_r^T\|_F^2 = \|A - Q_c B_k Q_r^T\|_F^2 \quad (\text{S.1})$$

*In addition:*

$$\begin{aligned} \|A - Q_c B_k Q_r^T\|_F^2 &\leq \|A - A_k\|_F^2 + \|(I - Q_c Q_c^T) A_k\|_F^2 + \|A_k (I - Q_r Q_r^T)\|_F^2 \\ &\quad - 2\text{tr}\left(Q_c Q_c^T A_k Q_r Q_r^T (A - A_k)^T\right) \end{aligned} \quad (\text{S.2})$$

*Proof.* We start by taking column-orthogonal matrices of dimensions  $m \times (m-c)$  and  $n \times (n-r)$  labeled  $\hat{Q}_c$  and  $\hat{Q}_r$ , respectively, so that  $\begin{pmatrix} Q_c & \hat{Q}_c \end{pmatrix}$  and  $\begin{pmatrix} Q_r & \hat{Q}_r \end{pmatrix}$  are both orthogonal matrices. Then, the unitary invariance of the Frobenius norm and orthogonality give

$$\begin{aligned} \|A - Q_c B Q_r^T\|_F^2 &= \left\| \begin{pmatrix} Q_c^T A Q_r - B & Q_c^T A \hat{Q}_r \\ \hat{Q}_c^T A Q_r & \hat{Q}_c^T A \hat{Q}_r \end{pmatrix} \right\|_F^2 \\ &= \|A - Q_c (Q_c^T A Q_r) Q_r^T\|_F^2 + \|Q_c^T A Q_r - B\|_F^2 \end{aligned}$$

Thus, the last term in the expression above is minimized when  $B = B_k$ , which gives us (S.1). Since  $B_k$  is the minimizer, we can replace it with  $Q_c^T A_k Q_r$  to

get the inequality

$$\begin{aligned}
\|A - Q_c B_k Q_r^T\|_F^2 &\leq \|A - Q_c (Q_c^T A_k Q_r) Q_r^T\|_F^2 \\
&= \|A - Q_c Q_c^T A_k + Q_c Q_c^T A_k - Q_c (Q_c^T A_k Q_r) Q_r^T\|_F^2 \\
&= \|A - A_k + A_k - Q_c Q_c^T A_k\|_F^2 + \|Q_c Q_c^T (A_k - A_k Q_r Q_r^T)\|_F^2 \\
&\quad + 2\mathbf{tr} \left( (A - A_k)^T Q_c Q_c^T A_k (I - Q_r Q_r^T) \right) \\
&= \|A - A_k\|_F^2 + 2\mathbf{tr} \left( (A - A_k) A_k^T (I - Q_c Q_c^T) \right) \\
&\quad + \|(I - Q_c Q_c^T) A_k\|_F^2 + \|Q_c Q_c^T (A_k - A_k Q_r Q_r^T)\|_F^2 \\
&\quad + 2\mathbf{tr} \left( (A - A_k)^T Q_c Q_c^T A_k (I - Q_r Q_r^T) \right) \\
&\leq \|A - A_k\|_F^2 + \|(I - Q_c Q_c^T) A_k\|_F^2 + \|A_k (I - Q_r Q_r^T)\|_F^2 \\
&\quad - 2\mathbf{tr} \left( (A - A_k)^T Q_c Q_c^T A_k (Q_r Q_r^T) \right),
\end{aligned}$$

which is (S.2). In the last inequality, we have used once the fact that  $Q_c Q_c^T$  is an orthogonal projection and twice the fact that  $(A - A_k) A_k^T = 0$  via the SVD.  $\square$

## 2 Deterministic Analysis

We begin with some notes about partitioning  $A$  by columns and rows. Let  $\Pi_c \in \mathbb{R}^{n \times c}$  and  $\Pi_r \in \mathbb{R}^{m \times r}$  be matrices that represent the column and row choices, respectively, of our algorithm such that  $(\Pi_c \ \Pi_c^\perp) \in \mathbb{R}^{n \times n}$  and  $(\Pi_r \ \Pi_r^\perp) \in \mathbb{R}^{m \times m}$  are a permutation matrices.

$$\begin{aligned}
(\Pi_r \ \Pi_r^\perp)^T A (\Pi_c \ \Pi_c^\perp) &= U \Sigma V^T (\Pi_c \ \Pi_c^\perp) \\
&= \begin{pmatrix} U_{11} & U_{12} \\ U_{21} & U_{22} \end{pmatrix} \left( \begin{pmatrix} \Sigma_1^{(T)} & 0 \\ 0 & \Sigma_1^{(O)} \end{pmatrix} \begin{pmatrix} 0 \\ \Sigma_2 \end{pmatrix} \right) \begin{pmatrix} V_{11}^T & V_{21}^T \\ V_{12}^T & V_{22}^T \end{pmatrix}
\end{aligned}$$

From this point on, we refer to

$$\begin{aligned}
\Omega &\stackrel{def}{=} \begin{pmatrix} \Omega_1 \\ \Omega_2 \end{pmatrix} \stackrel{def}{=} \begin{pmatrix} V_{11}^T \\ V_{12}^T \end{pmatrix} \\
\Psi &\stackrel{def}{=} \begin{pmatrix} \Psi_1 \\ \Psi_2 \end{pmatrix} \stackrel{def}{=} \begin{pmatrix} U_{11}^T \\ U_{12}^T \end{pmatrix}
\end{aligned}$$

We change notation at this point because these principles go far beyond column and row selection. For example, if either  $\Pi_c$  or  $\Pi_r$  were an iid Gaussian matrix, the following results will still hold.

By definition, the matrix  $C \in \mathbb{R}^{m \times c}$  produced by our algorithm is  $A\Pi_c$ .

$$C = A\Pi_c = U \left( \begin{pmatrix} \Sigma_1^{(T)} & 0 \\ 0 & \Sigma_1^{(O)} \\ 0 & 0 \end{pmatrix} \begin{matrix} 0 \\ \Sigma_2 \end{matrix} \right) \begin{pmatrix} \Omega_1 \\ \Omega_2 \end{pmatrix}$$

Now, we are interested in the matrix  $CX = CC^\dagger A$ . In order to get a grip on the orthogonal projector  $CC^\dagger$ , we will study the column space of  $C$  via post-multiplying by a judiciously chosen square invertible matrix  $Y_c \in \mathbb{R}^{c \times c}$  (cf. [3]). This may change the matrix, but it preserves the column space.

$$\begin{aligned} CY_c &:= C \left[ \begin{matrix} \Omega_1^\dagger \begin{pmatrix} \Sigma_1^{(T)} & 0 \\ 0 & \Sigma_1^{(O)} \end{pmatrix}^{-1} \\ \vdots \\ Z_c \end{matrix} \right] \\ &= U \left( \begin{pmatrix} \Sigma_1^{(T)} & 0 \\ 0 & \Sigma_1^{(O)} \\ 0 & 0 \end{pmatrix} \begin{matrix} 0 \\ \Sigma_2 \end{matrix} \right) \begin{pmatrix} \Omega_1 \\ \Omega_2 \end{pmatrix} \left[ \begin{matrix} (\Omega_1)^\dagger \begin{pmatrix} \Sigma_1^{(T)} & 0 \\ 0 & \Sigma_1^{(O)} \end{pmatrix}^{-1} \\ \vdots \\ Z_c \end{matrix} \right] \\ &= U \begin{pmatrix} I_k & 0 & 0 \\ 0 & I_{p-k} & 0 \\ H_1 & H_2 & H_3 \end{pmatrix} \end{aligned}$$

where we assume that  $\Omega_1 \in \mathbb{R}^{c \times p}$  is full rank and  $Z_c \in \mathbb{R}^{c \times (c-p)}$  is a matrix such that  $\Omega_1 Z_c = 0$ . This gives us that

$$H_1 = \Sigma_2 \Omega_2 \Omega_1^\dagger \begin{pmatrix} (\Sigma_1^{(T)})^{-1} \\ 0 \end{pmatrix}, \quad H_2 = \Sigma_2 \Omega_2 \Omega_1^\dagger \begin{pmatrix} 0 \\ (\Sigma_1^{(O)})^{-1} \end{pmatrix}, \quad H_3 = \Sigma_2 \Omega_2 Z_c$$

By the same procedure we can select rows from  $A$  to form  $R = \Pi_r^T A$ . As before, there is an invertible matrix  $Y_r \in \mathbb{R}^{r \times r}$  such that

$$Y_r R = \begin{pmatrix} I_k & 0 & 0 \\ 0 & I_{p-k} & 0 \\ G_1 & G_2 & G_3 \end{pmatrix}^T V^T$$

where

$$G_1 = \Sigma_2 \Psi_2 \Psi_1^\dagger \begin{pmatrix} (\Sigma_1^{(T)})^{-1} \\ 0 \end{pmatrix}, \quad G_2 = \Sigma_2 \Psi_2 \Psi_1^\dagger \begin{pmatrix} 0 \\ (\Sigma_1^{(O)})^{-1} \end{pmatrix}, \quad G_3 = \Sigma_2 \Psi_2 Z_r$$

Following [3], we are interested in upper bounds on  $\|H_1\|_2$  and  $\|G_1\|_2$ .

$$\begin{aligned} \|H_1\|_2 &\leq \frac{\sigma_{p+1}}{\sigma_k} \left\| \Omega_2 \Omega_1^\dagger \right\|_2, \quad \text{and} \quad \left\| (I + H_1^T H_1)^{-1/2} \right\|_2 \geq \frac{1}{\sqrt{1 + \left( \frac{\sigma_{p+1}}{\sigma_k} \right)^2 \left\| \Omega_2 \Omega_1^\dagger \right\|_2^2}} \\ \|G_1\|_2 &\leq \frac{\sigma_{p+1}}{\sigma_k} \left\| \Psi_2 \Psi_1^\dagger \right\|_2, \quad \text{and} \quad \left\| (I + G_1^T G_1)^{-1/2} \right\|_2 \geq \frac{1}{\sqrt{1 + \left( \frac{\sigma_{p+1}}{\sigma_k} \right)^2 \left\| \Psi_2 \Psi_1^\dagger \right\|_2^2}}. \end{aligned}$$

To develop lower bounds on computed singular values, let

$$U \begin{pmatrix} I_k & 0 & 0 \\ 0 & I_{p-k} & 0 \\ H_1 & H_2 & H_3 \end{pmatrix} =: \widehat{Q}\widehat{R} =: (\widehat{Q}_1 \quad \widehat{Q}_2 \quad \widehat{Q}_3) \begin{pmatrix} \widehat{R}_{11} & \widehat{R}_{12} & \widehat{R}_{13} \\ 0 & \widehat{R}_{22} & \widehat{R}_{23} \\ 0 & 0 & \widehat{R}_{33} \end{pmatrix}, \quad (\text{S.3})$$

$$V \begin{pmatrix} I_k & 0 & 0 \\ 0 & I_{p-k} & 0 \\ G_1 & G_2 & G_3 \end{pmatrix} =: \widetilde{Q}\widetilde{R} =: (\widetilde{Q}_1 \quad \widetilde{Q}_2 \quad \widetilde{Q}_3) \begin{pmatrix} \widetilde{R}_{11} & \widetilde{R}_{12} & \widetilde{R}_{13} \\ 0 & \widetilde{R}_{22} & \widetilde{R}_{23} \\ 0 & 0 & \widetilde{R}_{33} \end{pmatrix}. \quad (\text{S.4})$$

It follows from (cf. [3]) that

$$Q_c Q_c^T = \widehat{Q}\widehat{Q}^T, \quad Q_r Q_r^T = \widetilde{Q}\widetilde{Q}^T.$$

Consider the first  $k$  columns of the above expression, i.e.

$$U \begin{pmatrix} I \\ 0 \\ H_1 \end{pmatrix} = \widehat{Q}_1 \widehat{R}_{11}$$

Since  $R_{11}^T R_{11} = I + H_1^T H_1$ , the polar decomposition tells us that  $R_{11}$  can be written in the form

$$\widehat{R}_{11} = W_c (I + H_1^T H_1)^{1/2}$$

for some orthogonal matrix  $W_c \in \mathbb{R}^{k \times k}$ . Thus, we can write

$$\widehat{Q}_1 = U \begin{pmatrix} I \\ 0 \\ H_1 \end{pmatrix} (I + H_1^T H_1)^{-1/2} W_c^T$$

By the same reasoning, we also have

$$\widetilde{Q}_1 = V \begin{pmatrix} I \\ 0 \\ G_1 \end{pmatrix} (I + G_1^T G_1)^{-1/2} W_r^T$$

for some orthogonal matrix  $W_r \in \mathbb{R}^{k \times k}$ . Next, by the interlacing theorem for singular values, we have

$$\begin{aligned} \sigma_k(CUR) &= \sigma_k(\widehat{Q}^T A \widetilde{Q}) \\ &\geq \sigma_k(\widehat{Q}_1^T A \widetilde{Q}_1) \\ &= \sigma_k\left((I + H_1^T H_1)^{-1/2} (\Sigma_1 + H_1^T \Sigma_3 G_1) (I + G_1 G_1^T)^{-1/2}\right) \\ &\geq \frac{\sigma_k - \sigma_{p+1} \left(\frac{\sigma_{p+1}}{\sigma_k}\right)^2 \|\Omega_2 \Omega_1^\dagger\|_2 \|\Psi_2 \Psi_1^\dagger\|_2}{\sqrt{1 + \left(\frac{\sigma_{p+1}}{\sigma_k}\right)^2 \|\Omega_2 \Omega_1^\dagger\|_2^2} \sqrt{1 + \left(\frac{\sigma_{p+1}}{\sigma_k}\right)^2 \|\Psi_2 \Psi_1^\dagger\|_2^2}}. \end{aligned}$$

Now we bound the Frobenius-norm using Theorem S.1. By Theorem 4.4 of [3],

$$\left\| \left( I - \widehat{Q}\widehat{Q}^T \right) A_k \right\|_F^2 \leq k\sigma_{p+1}^2 \left\| \Omega_2 \Omega_1^\dagger \right\|_2^2, \quad \left\| A_k \left( I - \widetilde{Q}\widetilde{Q}^T \right) \right\|_F^2 \leq k\sigma_{p+1}^2 \left\| \Psi_2 \Psi_1^\dagger \right\|_2^2. \quad (\text{S.5})$$

To bound the last term in equation (S.2), we re-partition equations (S.3) and (S.4)

$$\begin{pmatrix} I_k & 0 & 0 \\ 0 & I_{p-k} & 0 \\ H_1 & H_2 & H_3 \end{pmatrix} \stackrel{\text{def}}{=} \begin{pmatrix} I_p & 0 \\ \widehat{H}_1 & \widehat{H}_2 \end{pmatrix}, \quad \begin{pmatrix} I_k & 0 & 0 \\ 0 & I_{p-k} & 0 \\ G_1 & G_2 & G_3 \end{pmatrix} \stackrel{\text{def}}{=} \begin{pmatrix} I_p & 0 \\ \widetilde{G}_1 & \widetilde{G}_2 \end{pmatrix}$$

and define accordingly

$$U^T \widehat{Q} = \begin{pmatrix} \widehat{Q}_{11} & \widehat{Q}_{12} \\ \widehat{Q}_{21} & \widehat{Q}_{22} \end{pmatrix}, \quad \widehat{\Sigma}_2 = \mathbf{diag}(\Sigma_1^{(O)}, \Sigma_2), \quad V^T \widetilde{Q} = \begin{pmatrix} \widetilde{Q}_{11} & \widetilde{Q}_{12} \\ \widetilde{Q}_{21} & \widetilde{Q}_{22} \end{pmatrix}.$$

Now we rewrite

$$\begin{aligned} \mathbf{tr} \left( Q_c Q_c^T A_k Q_r Q_r^T (A - A_k)^T \right) &= \mathbf{tr} \left( \widehat{Q}\widehat{Q}^T A_k \widetilde{Q}\widetilde{Q}^T (A - A_k)^T \right) \\ &= \mathbf{tr} \left( \begin{pmatrix} \widehat{Q}_{11} & \widehat{Q}_{12} \\ \widehat{Q}_{21} & \widehat{Q}_{22} \end{pmatrix} \begin{pmatrix} \widehat{Q}_{11} & \widehat{Q}_{12} \\ \widehat{Q}_{21} & \widehat{Q}_{22} \end{pmatrix}^T \begin{pmatrix} \Sigma_1^{(T)} & 0 \\ 0 & 0 \end{pmatrix} \begin{pmatrix} \widetilde{Q}_{11} & \widetilde{Q}_{12} \\ \widetilde{Q}_{21} & \widetilde{Q}_{22} \end{pmatrix} \begin{pmatrix} \widetilde{Q}_{11} & \widetilde{Q}_{12} \\ \widetilde{Q}_{21} & \widetilde{Q}_{22} \end{pmatrix}^T \begin{pmatrix} 0 & 0 \\ 0 & \widehat{\Sigma}_2 \end{pmatrix} \right) \\ &= \mathbf{tr} \left( \begin{pmatrix} 0 & 0 \\ \widehat{Q}_{21} & \widehat{Q}_{22} \end{pmatrix} \begin{pmatrix} \widehat{Q}_{11} & \widehat{Q}_{12} \\ 0 & 0 \end{pmatrix}^T \begin{pmatrix} \Sigma_1^{(T)} & 0 \\ 0 & 0 \end{pmatrix} \begin{pmatrix} \widetilde{Q}_{11} & \widetilde{Q}_{12} \\ 0 & 0 \end{pmatrix} \begin{pmatrix} 0 & 0 \\ \widetilde{Q}_{21} & \widetilde{Q}_{22} \end{pmatrix}^T \begin{pmatrix} 0 & 0 \\ 0 & \widehat{\Sigma}_2 \end{pmatrix} \right) \\ &= \mathbf{tr} \left( \left( \begin{pmatrix} \widehat{Q}_{21} & \widehat{Q}_{22} \end{pmatrix} \begin{pmatrix} \widehat{Q}_{11} & \widehat{Q}_{12} \end{pmatrix}^T \Sigma_1^{(T)} \right) \left( \begin{pmatrix} \widetilde{Q}_{11} & \widetilde{Q}_{12} \\ \widetilde{Q}_{21} & \widetilde{Q}_{22} \end{pmatrix}^T \widehat{\Sigma}_2 \right) \right). \end{aligned}$$

To continue, we notice that

$$\begin{aligned} &\left\| \begin{pmatrix} \widehat{Q}_{21} & \widehat{Q}_{22} \end{pmatrix} \begin{pmatrix} \widehat{Q}_{11} & \widehat{Q}_{12} \end{pmatrix}^T \Sigma_1^{(T)} \right\|_F \\ &\leq \left\| \begin{pmatrix} I - \begin{pmatrix} \widehat{Q}_{11} & \widehat{Q}_{12} \\ \widehat{Q}_{21} & \widehat{Q}_{22} \end{pmatrix} \begin{pmatrix} \widehat{Q}_{11} & \widehat{Q}_{12} \\ \widehat{Q}_{21} & \widehat{Q}_{22} \end{pmatrix}^T & - \begin{pmatrix} \widehat{Q}_{11} & \widehat{Q}_{12} \\ \widehat{Q}_{21} & \widehat{Q}_{22} \end{pmatrix} \begin{pmatrix} \widehat{Q}_{21} & \widehat{Q}_{22} \end{pmatrix}^T \\ - \begin{pmatrix} \widehat{Q}_{21} & \widehat{Q}_{22} \end{pmatrix} \begin{pmatrix} \widehat{Q}_{11} & \widehat{Q}_{12} \end{pmatrix}^T & I - \begin{pmatrix} \widehat{Q}_{21} & \widehat{Q}_{22} \\ \widehat{Q}_{21} & \widehat{Q}_{22} \end{pmatrix} \begin{pmatrix} \widehat{Q}_{21} & \widehat{Q}_{22} \end{pmatrix}^T \end{pmatrix} \begin{pmatrix} \Sigma_1^{(T)} \\ 0 \end{pmatrix} \right\|_F \\ &= \left\| \begin{pmatrix} I - \begin{pmatrix} \widehat{Q}_{11} & \widehat{Q}_{12} \\ \widehat{Q}_{21} & \widehat{Q}_{22} \end{pmatrix} \begin{pmatrix} \widehat{Q}_{11} & \widehat{Q}_{12} \\ \widehat{Q}_{21} & \widehat{Q}_{22} \end{pmatrix}^T \end{pmatrix} \begin{pmatrix} \Sigma_1^{(T)} \\ 0 \end{pmatrix} \right\|_F \\ &= \left\| \left( I - \widehat{Q}\widehat{Q}^T \right) A_k \right\|_F \leq \sqrt{k}\sigma_{p+1} \left\| \Omega_2 \Omega_1^\dagger \right\|_2. \end{aligned}$$

Similarly, we can derive

$$\left\| \begin{pmatrix} \widetilde{Q}_{11} & \widetilde{Q}_{12} \\ \widetilde{Q}_{21} & \widetilde{Q}_{22} \end{pmatrix}^T \widehat{\Sigma}_2 \right\|_F \leq \sqrt{k}\sigma_{p+1} \left\| \Psi_2 \Psi_1^\dagger \right\|_2.$$

By the Cauchy-Schwartz inequality, we combine these two upper bounds to get

$$\left| \text{tr} \left( Q_c Q_c^T A_k Q_r Q_r^T (A - A_k)^T \right) \right| \leq k \sigma_{p+1}^2 \left\| \Omega_2 \Omega_1^\dagger \right\|_2 \left\| \Psi_2 \Psi_1^\dagger \right\|_2.$$

Plugging this and upper bounds (S.5) into equation (S.2), we have

$$\begin{aligned} \|A - CUR\|_F^2 &\leq \|A - (CUR)_k\|_F^2 \\ &\leq \sum_{j=k+1}^{\rho} \sigma_j^2 + k \sigma_{p+1}^2 \left( \left\| \Omega_2 \Omega_1^\dagger \right\|_2 + \left\| \Psi_2 \Psi_1^\dagger \right\|_2 \right)^2 \end{aligned}$$

as desired. The spectral norm bound is simply the consequence of Theorem 3.5 of [3].

### 3 Proof of Deterministic Algorithm

Apply equation (7) to  $\mathbf{U}_1$  and  $\mathbf{V}_1^T$ , we have

$$\begin{aligned} \left\| \Omega_1^\dagger \right\|_2 &\leq \frac{\sqrt{c} - \sqrt{p}}{\sqrt{(\sqrt{n-p} + \sqrt{c})^2 + (\sqrt{c} - \sqrt{p})^2}}, \\ \left\| \Psi_1^\dagger \right\|_2 &\leq \frac{\sqrt{r} - \sqrt{p}}{\sqrt{(\sqrt{m-p} + \sqrt{r})^2 + (\sqrt{r} - \sqrt{p})^2}}. \end{aligned}$$

Further notice that  $\Omega_2$  and  $\Psi_2$  are submatrices of  $\mathbf{U}_2^T$  and  $\mathbf{V}_2^T$ , respectively, and so their singular values are at most 1.

### 4 Proof of Uniform Sampling Algorithm

By [2], it is shown that

$$\left\| \Omega_1^\dagger \right\|_2^2 \leq \frac{n}{(1-\epsilon)c}$$

By symmetry, we have

$$\left\| \Psi_1^\dagger \right\|_2^2 \leq \frac{m}{(1-\epsilon)r}.$$

### 5 Proof of Leverage Score Sampling Algorithm

By the proof of lemma 1 from [1], we have that with probability at least 0.9,

$$1 - \sigma_{\min}^2(\Omega_1) \leq \epsilon$$

Therefore, we have

$$\left\| \mathbf{\Omega}_1^\dagger \right\|_2^2 \leq \frac{1}{1 - \epsilon}$$

By symmetry, we have

$$\left\| \mathbf{\Psi}_1^\dagger \right\|_2^2 \leq \frac{1}{1 - \epsilon}.$$

## References

- [1] P. Drineas, M. W. Mahoney, and S. Muthukrishnan. Relative-error CUR matrix decompositions. *SIAM Journal on Matrix Analysis and Applications*, 30(2):844–881, 2008.
- [2] A. Gittens. The spectral norm error of the naive Nyström extension. *arXiv preprint arXiv:1110.5305*, 2011.
- [3] M. Gu. Subspace iteration randomization and singular value problems. *arXiv preprint arXiv:1408.2208*, 2014.
